# Supplementary material for: 2019 American Neuropsychiatric Association Annual Meeting Abstracts
Source: Atypon-hosted journal article supplement (doi:10.1176/appi.neuropsych.18100235), 2019-07-01
Supplement: appi.neuropsych.18100235.ds001.pdf [file appi.neuropsych.18100235.ds001.pdf]

# ABSTRACTS

## Presented at the 30<sup>th</sup> Annual Meeting of the American Neuropsychiatric Association

March 20-23, 2019  
The Westin Michigan Avenue

Chicago ILLINOIS

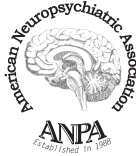

### ANPA Executive Committee

#### President

Robin A. Hurley, MD, FANPA

#### Immediate Past President

John J. Campbell, MD, FANPA

#### President Elect

Kaloyan Tanev, MD, FANPA

#### Treasurer

C. Edward Coffey, MD, FANPA

### ANPA Scientific Program Committee Members and Reviewers

**Chair:** Kaloyan Tanev, MD, FANPA

Kevin Black, MD, FANPA

Nash Boutros, MD

Joan Camprodon, MD, PhD

Zeima Chemali, MD

Donald Eknoyan, MD, FANPA

Manish Fozdar, MD

Omar Ghaffar, MD, MSc,

FRCPC, FANPA

Eric Goldwasser, MD

Daniel Kaufer, MD, FANPA

Paul Malloy, PhD.

Richard Ronan Murphy, MD

Nicholas Nunez, MD

Ricardo Salazar, MD

Jeremiah Scharf, MD, PhD

Barbara Schildkrout, MD,

FANPA

Katherine Taber, PhD, FANPA

## Awards Presented at the 2019 Annual Meeting

### Gary J. Tucker, MD Lifetime Achievement Award in Neuropsychiatry

Established in his memory, the Gary J. Tucker, MD Award in Neuropsychiatry is the highest honor bestowed by ANPA and is presented to an individual who has demonstrated sustained commitment and service to ANPA and whose career has best exemplified the professional and personal values of Dr. Tucker. These values include academic leadership in Neuropsychiatry, commitment, mentoring, and scholarship. Recipients shall have demonstrated such values through a lifetime commitment to improving our understanding of brain-behavior relationships as they affect mental illness.

#### The 2019 awardee is:

Barry Fogel, MD.

### Fellow of the American Neuropsychiatric Association

The designation of Fellow of the American Neuropsychiatric Association recognizes significant contributions to the field of neuropsychiatry, behavioral neurology, neuropsychology or the clinical neurosciences and to the Association.

#### The individuals elected as a Fellow of ANPA in 2019 are:

Gaston Baslet, MD, FANPA

Ronan Murphy, MD, FANPA

Michael Schrifft, MD, FANPA

### The Sidney R. Baer Jr. Career Development Award

The ANPA Career Development Award Program recognizes an advanced trainee in neuropsychiatry, behavioral neurology or neuropsychology whose accomplishments during training offer promise of a successful career in neuropsychiatry and the clinical neurosciences.

#### The 2019 awardee:

Aaron Boes, MD, PhD

### ANPA Young Investigator Awards

The ANPA Young Investigator Award recognizes early trainees who are embarking on promising careers in the clinical neurosciences. The recipients are chosen from the submitted presentations at the Annual Meeting. The decisions are based on the quality of the abstract submission and, more broadly, the candidate's perceived ability to make a contribution to the field with the encouragement and support provided by the award.

#### The Young Investigator 2019 awardees:

Ashley Holland, DO

Matthew J. Burke, MD, FRCPC

### ANPA Clinical Neuroscience Trainee Award

ANPA Clinical Neuroscience Trainee Award recognizes an outstanding trainee with special accomplishments or involvement in the clinical neurosciences. This award was designed to facilitate early involvement in ANPA by highly motivated residents in psychiatry or neurology, considering careers in neuropsychiatry or behavioral neurology, or doctoral candidates considering careers in neuropsychology.

#### The Clinical Neuroscience Trainee 2019 awardee:

Kathy Niu, MD

Full text of the abstracts presented at the Meeting accompanies the online edition of the Summer 2019 issue, at <http://neuro.psychiatryonline.org>. The abstracts can be cited in the following format:

Author name(s): Title of abstract, in Abstracts Presented at the 30th Annual Meeting of the American Neuropsychiatric Association. *J Neuropsychiatry Clin Neurosci* 2019; 31(3):e1–e29

- P1. New Onset Psychosis in Pregnancy Following Steroid Course: Maintain a Broad Differential, but Trust Your Findings.** *Alexandra L. Aaronson, Michael J. Schrift*
- P2. Extreme Weather Events and the Onset of Psychotic Depression.** *Janette K. Abramowitz, Bruce Barton, Larry Kandel, Anthony J. Rothschild*
- P3. Regional Brain Structure Interactions With Genetic Variants in Neurotransmitter Systems Associated With Hallucinations and Delusions in Alzheimer's Disease.** *Juweiriya Ahmed, Andrew D. Robertson, Sejal Patel, Derek Beaton, Lena Palaniyappan, Stephen Pasternak, Mario Masellis, Elizabeth Finger*
- P4. The Association of Manic Behavior and Bipolar Disorder among Patients With Frontotemporal Dementia.** *Golnoush Akhlaghipour, Leila Parand, Mario F. Mendez*
- P5. Dandy-Walker Variant—Neuropsychiatric Management and the Role of the Cerebellum.** *Sherese Ali*
- P6. Personification of Limbs Following Subarachnoid Hemorrhage and Right Sided Lobectomy.** *Chetan Amar, Michael Schrift*
- P7. Catatonia and New Onset Normocalcemic Hyperparathyroidism Improve Following ECT: A Case of Catatonia-Induced Neuroendocrine Dysfunction?** *Emma Babb, Neha Reddy, Clara Suh, Eric Gausche, Michael Schrift*
- P8. "Cyclops" Hallucinations in a Patient With Bilateral Occipital Lobe Strokes and Cataracts on Gabapentin.** *Talha John Baloch, Nana Cudjoe, Artemus Holguin-Mills-Hoffman, Jeffrey Bennett*
- P9. Mindfulness-Based Psychotherapy for Psychogenic Nonepileptic Seizures: An Uncontrolled Trial.** *Gaston Baslet, Barbara A. Dworetzky, Laura Morrissey, Robert Ridlon, Margaret Latawiec, Timothy Larose, Alexa Ehlert, Megan Oser*
- P10. Apraxia and Diminished Facial Expression With Right Frontal Brain Neurodegeneration.** *James R. Bateman, Christopher M. Filley, Elliott D. Ross, Brianne M. Bettcher, H. Isabel Hubbard, Miranda Babiak, Peter S. Pressman*
- P11. Neurodegenerative Dementias: Improving Brain Health to Decrease Risk.** *James R. Bateman, Robin A. Hurley, Katherine H. Taber*
- P12. Recurrent Catatonia and Psychosis Later Diagnosed as Frontal Lobe Epilepsy.** *Austin W. Blum, Martin L. Greenwald, Michel Medina, Reeti Greenwald, Zehra N. Aftab*
- P13. Lesion-Symptom Mapping of General Cognitive Ability in Humans.** *Mark D. Bowren, Joel Bruss, Kenneth Manzel, Daniel Tranel, Aaron D. Boes*
- P14. Cognitive Impairments in Self-Induced Anoxic Brain Injury.** *Michelle L. Bryant, Ashima Datey-Chakrabarty, Santosh Shrestha*
- P15. Embodied Virtual Reality Mirror Visual Feedback For an Adult With Cerebral Palsy.** *Kim Bullock, Andrea Stevenson Won, Jeremy Bailenson, Helen Bronte Stewart, Luciana Giambarberi, Aryandokht Fotros*
- P16. Coordinate-Based Network Mapping of Migraine.** *Matthew J. Burke, Juho Joutsa, Alexander Cohen, Louis Soussand, Rami Burstein, Michael D. Fox*
- P17. Folie à Deux: Pareidolia of Demonic Images.** *Jasmine M. Campbell, Chevelle Winchester, Alan R. Hirsch*
- P18. Cerebellar Pontine Angle Tumor Presenting With Mania.** *Smrithi-Ann F. Chakkalakal, Eric Reed, Sree Katragadda, Joseph J. Cooper*
- P19. A Case of New Onset Psychosis in a Patient With a Recent EBV Infection.** *Nana K. Cudjoe, Santosh Shrestha*
- P20. Seronegative Autoimmune Encephalitis in a 14-Year-Old With Psychosis and Catatonia.** *Erik C. Curry, Elizabeth E. Hathaway, Nick J. Berg, Cassie D. Karlsson*
- P21. Maternal Pre-Eclampsia and Offspring ADHD at 7 and 10 Years: ALSPAC Birth Cohort Study.** *Berihun A. Dachew, James G. Scott, Abdullah Mamun, Rosa Alati*
- P22. Age-Related Differences in Electrophysiological Activity in Response to Increasing Sensory Degradation and Visual Task Demands.** *Kirk Daffner, Adam Billig, Hura Behforuzi, Nicole Feng*
- P23. Compulsive Joke Telling: Witzelsucht in a Patient With Frontotemporal Dementia.** *Kimberly E. DiManna, Clifford M. Singer, John J. Campbell III*
- P24. Psychosis of Epilepsy: Characterization of "Odd" Behavior in a Patient With a Negative Continuous EEG.** *Joshua Eloge*
- P25. Cyclical Steroid-Responsive Psychosis in a Young Woman With Leukemia.** *Nazlie Faridi, Viviane Zicherman*
- P26. A Systematic Review of Attitudes of Medical Students Toward Electroconvulsive Therapy.** *Michael Ferguson, Badr Ratnakaran, Anita S. Kablinger*
- P27. Maternal Prenatal Thyroid Function and Non-Clinical Psychotic Experiences in Early Adolescence.** *Dagnachew M. Fetene, Kim S. Betts, Berihun A. Dachew, Rosa Alati*
- P28. Social Cognition and White Matter: A Clinical Perspective.** *Christopher M. Filley*

- P29. The Brain Health Champion Study: Promoting Non-Pharmacological Interventions in Cognitive Disorders.** Seth Gale, Hope Schwartz, Brittany McFeeley, Kirk Daffner
- P30. Exploring Intimate Partner Violence in Psychogenic Nonepileptic Seizures.** Daniela Galluzzo, Stephanie Argraves, Ebony Jackson Shaheed, Joseph Goulet, Cynthia Brandt, Mary Jo Pugh, Hamada Altalib
- P31. A Red Herring: An Unusual Case of Frontotemporal Dementia Complicated by Excitatory Catatonia.** Mounika Ganguly, Kevin Johns, Katherine B. Brownlowe
- P32. Neurobehavioral Sequelae of West Nile Virus Infection (WNV) With Encephalitis: A Pediatric Case Study.** Mary Reeni M. George, Ryan Rochat, Gail Demmler
- P33. "How Did I Get Here?" A Case Report on Transient Global Amnesia and Clinical Significance for Multiple Medical Specialties.** Sadia Ghani, Eric Taylor
- P34. Withdrawal or Intoxication? Case Report Regarding Unregulated Use of Tianeptine, Etizolam, and Phenibut in the USA.** Sadia Ghani, Eric Taylor, Siddesh Gopalakrishnan
- P35. Bipolar Disorder or Not? Case Report of Lacosamide Associated Mania in Elderly Man.** Sadia Ghani, Eric Taylor, Naweed Hayat
- P36. Diffusion Tensor Imaging in Predementia Risk States: White Matter Integrity Findings in Mild Behavioral Impairment.** Sascha Gill, Meng Wang, Nils D. Forkert, Frank P. MacMaster, Eric E. Smith, Zahinoor Ismail
- P37. Glutamate Antagonists in Treatment of Catatonia Related to Anti-N-methyl-D-aspartate Receptor Encephalitis: Two Cases and a Review of the Literature.** Lindsey Gurin, Katlyn Nemani
- P38. The Clinical Role of PET Imaging Biomarker in Diagnosis of Early Onset Alzheimer's Disease Dementia.** Shahul Hameed, Wahab Syed
- P39. Reading in the Absence of Visual Word Forms: A Case of Letter-by-Letter Dyslexia.** Aaron Hauptman, Michael Erkinen
- P40. Severe Adverse Childhood Events (ACEs) and Severe CADASIL: Is Telomere Shortening to Blame?** Ashley Holland, Elizabeth DeGrush, Sheldon Benjamin
- P41. Overlap of Chronic Psychosis, Parkinsonism and Dementia: Is MAPT the Missing Link?** Ashley Holland, Elizabeth DeGrush, Sheldon Benjamin, Eduardo Caussade Rodriguez
- P42. Predictive Utility of the Mild Behavioral Impairment Checklist in Subjective Cognitive Decline, Mild Cognitive Impairment, and Dementia.** Sophie Hu, Scott Patten, Gordon Fick, Eric Smith, Zahinoor Ismail
- P43. Teaching Materials to Assist in the Neuropsychiatric Investigation and Understanding of Poison Exposure Part IV—Complex Metal Ions.** Robin A. Hurley, James R. Bateman, Katherine H. Taber
- P44. Immediate and Long-Term Side Effects of Bilateral Anterior Capsulotomy.** Trevor Hurwitz, Christopher Honey, Nicolas Bogod, Annie Kuan, Caitlin Earle
- P45. Psychosis Secondary to Repetitive mTBI.** Devon Johnston
- P46. Clinical Correlates of Dream Enactment Behaviors in Previously Deployed, OEF/OIF/OND Veterans: An Exploratory Analysis.** Melissa Jones, Sangeeth Jeevan, Jingyan Wang, Ruosha Li, Ritwick Agrawal, Amir Sharafkaneh, Laura Marsh, Ricardo Jorge
- P47. Analysis of Theta Bursts and Slow Spindles During Sleep: Insights Into the Phase Coupling Memory Consolidation Model.** Rini Kaplan, Eugene Kronberg, Peter Teale, Brice McConnell
- P48. A Curious Cognitive-Behavioral Syndrome Where Motor Signs Make the Case.** Daniel I. Kaufer
- P49. Creating BIONiC (Brain Injury Outpatient Neuropsychiatric Care)—A TBI System of Care in Central Massachusetts.** Joseph M. Keating, Delia Bakeman, Muhammad Waqas Khan, David Christopher Freeman, Elizabeth DeGrush
- P50. Tic Suppression in Children With Recent-Onset Tics Predicts One-Year Tic Outcome.** Soyoun Kim, Deanna J. Greene, Amy Viehoever, Emily C. Bihun, Jonathan M. Koller, Jacqueline M. Hampton, Haley Acevedo, Bradley L. Schlaggar, Kevin J. Black
- P51. Preoperative Impulsivity and Visual Hallucinations Are Associated With Specific Patterns of Cognitive Changes Following Deep Brain Stimulation for Parkinson's Disease.** Ian H. Kratter, Jordan F. Karp, Ashley C. Whiteman, Michael T. Feyder, Yuefang Chang, Ahmed Jorge, R. Mark Richardson, Luke Henry
- P52. Catatonia as a Presenting Syndrome for Posterior Cortical Atrophy.** Michael Kritzer, Nabil Ali
- P53. When the Brain Doesn't Read the Textbook: A Case of Early-Onset Dementia and Uncertain Etiology.** Chadrick E. Lane, Sofia V. Noori, Mitchell Holt, Albert T. Higgins-Chen, Darren Volpe, Noah Capurso
- P54. Metronidazole Induced Psychosis in a Liver Cirrhosis Patient.** Shafi A.K. Lodhi, Hilja Ruegg
- P55. Measuring Synaptic Density in Parkinson's Disease With SV2A PET imaging.** David Matuskey, Mark Dias, Mika Naganawa, Takuya Toyonaga, Shannan Henry, Jim Ropchan, Nabeel Nabulsi, Yiyun Huang, Ivonne Suridjan, Robert Comley, Sjoerd J. Finnema, Sule Tinaz, Richard E. Carson
- P56. Feasibility and Acceptability of Smartphone Based Migraine Behavioral Therapy in the Headache Clinic: A Single Arm Study.** Mia T. Minen, Jane Padikkala, Sumaiya Tasneem, Samrachana Adhikari, Ashley Bagheri, Thomas Berk, Sarah Jinich, Scott Powers, Elizabeth Seng, Mary Ann Seveck, Richard B. Lipton
- P57. Aphasia and Dysarthria Caused by Cerebellar Hemorrhage.** Stanislav Naydin, Carlos Illingworth, Kathryn Lester, G. Peter Griebus

- P58. Paroxysmal Abnormal Movements in a Patient With Bipolar Disorder: A Diagnostic Challenge.** *Katlyn Nemani, Deepti Anbarasan, Lindsey Gurin*
- P59. Anti-NMDAR Encephalitis in a Patient With Bipolar Disorder: Are Isolated Psychiatric Presentations Rare or Rarely Discovered?** *Katlyn Nemani, Lindsey Gurin*
- P60. Thinking "Neuroendocrine" in Assessing Neurodegenerative Disorders.** *Amy L. Newhouse, Zeina Chemali*
- P61. Quality Improvement Project: Increasing Education About Postictal Agitation and Postictal Psychosis.** *Kathy L Niu, Janette Abramowitz, Ika Noviawaty*
- P62. A Case of Schizophrenia and Behavioral Variant Frontotemporal Dementia With C9orf72 Mutation.** *Kathy L. Niu, Joseph M. Keating, Sheldon Benjamin*
- P63. Failure to Thrive in a 66-Year-Old Female With Major Depressive Disorder (MDD).** *Glen E. Oriafio, Nayan Bhatia*
- P64. Individual Differences in Social Network Size Linked to Nucleus Accumbens and Hippocampal Volumes in Motor Functional Neurological Disorders.** *Juan Pablo Ospina, Rozita Jalilianhasanpour, Benjamin Williams, Ibai Diez, David L. Perez*
- P65. Behavioral Neurology & Neuropsychiatry: A Longitudinal Perspective on Training and Education.** *Justin B. Otis, John J. Campbell, Daniel I. Kaufer, C. Alan Anderson, Christopher M. Filley, David B. Arciniegas*
- P66. Slowly Progressive Sporadic Creutzfeldt-Jakob Disease With Late Development of MRI Abnormalities.** *Justin Otis, Samantha K. Holden*
- P67. Updates in Limb Apraxia.** *Leila Parand, Oleg Yerstein, Mario F. Mendez*
- P68. The Spectrum of False Reports in Neurological Disease: From Delusions to Fantastic Thinking.** *Leila Parand, Oleg Yerostein, Kathy Niu, Mario F. Mendez*
- P69. Central Pontine/Extrapontine Myelinolysis (CPEM) Presenting With Manic and Catatonic Symptoms.** *Vaibhav Patil, Rishab Gupta, Sukhjeet Singh, Ankur Goyal, Koushik Sinha Deb*
- P70. Automated Classification of Atypical Neurocognitive Disorders Using Conversational Speech.** *Peter S. Pressman, Sebastien Levy, George Netscher, Kevin B. Cohen, Lawrence E. Hunter, Alexandre N. Bayen, Robert W. Levenson*
- P71. The Many Facets of Akathisia in Neuropsychiatry: Lessons From a Clinical Case.** *Mahdi Razafsha, Ottavio V. Vitolo*
- P72. The 20-Year-Old, 20-Centimeter Mass: A Case of Untreated Psychosis in a Patient with Invasive Squamous Cell Carcinoma.** *Sumi Rebeiro, Nana Cudjoe, Obiora Onwuameze*
- P73. Classifying Agrammaticality in Primary Progressive Aphasia Using Computational Linguistics.** *Neguine Rezaii, Megan Quimby, Daisy Hochberg, Claire Cordella, Phillip Wolff, Bradford Dickerson*
- P74. Experience With Prolonged EEG Monitoring in Inpatient Rehabilitation Setting: A Case Series.** *Julia Ridgeway-Diaz, Melissa Jones, Amy Corcoran, Sudha Tallavajhula*
- P75. Treatment of Anxiety and Epilepsy With Clobazam: Preliminary Results From an Open Label Clinical Trial.** *Jay Salpekar, Molly Phelps, Jennifer Bodensteiner*
- P76. Translation to Spanish and Cultural Adaptation of the Long and Short Versions of the Delirium Motor Subtype Scale.** *Paola A. Serna, Alejandra M. Giraldo, Juan D. Velásquez-Tirado, Esteban Sepúlveda, María V. Ocampo, José G. Franco, David Meagher*
- P77. Use of Intracranial EEG in Catatonia Secondary to Temporal Lobe Epilepsy.** *Eric R. Silverman, Emily J. Lelchuk, John S. Cummins, Joseph J. Cooper*
- P78. Hyperactive Delirium or Delirium Mania (Bell's Mania): Diagnostic and Treatment Implications.** *Prabhjyot Singh*
- P79. Preliminary Evidence of Atypical Somatic Symptoms in Individuals With Post-Concussion Syndrome.** *Jacob L. Stubbs, Katherine E. Green, Andrew Howard, Noah Silverberg, Amrit Dhariwal, Victoria Purcell, William J. Panenka*
- P80. Right Hemisphere Syndrome in the Real World of Traumatic Brain Injury: Three Longitudinal Cases Seen in the Neuropsychiatry Program at Sheppard Pratt Health System.** *Aaron E. Winkler, Vassilis E. Koliatsos*
- P81. Graduated Electrical Decelerator Effectiveness for Severe Dangerous Behaviors in Autistic Children: Case Study.** *Golnaz Yadollahikholes, Miles Cunningham, Nathan Blenkush*
- P82. Resolution of Splenium Enhancement Following ECT for Suspected Neuroleptic Malignant Syndrome in a Patient With Schizophrenia.** *Jacob E. Yomtoob, Jacqueline J. Hirsch, Lisa J. Rosenthal, Michael J. Schrift*
- P83. Cognition in Dostoevsky's Epilepsy.** *Taylor R. Young, Elizabeth Degrush, Sheldon Benjamin*
- P84. Tourette Syndrome Genome-Wide Polygenic Risk Correlates With Lifetime Disease Severity and Supports Reclassification of Tic Disorders Along a Continuous Developmental Spectrum.** *Dongmei Yu, Jae Hoon Sul, Fotis Tsetsos, Muhammad S. Nawaz, Hreinn Stefansson, Lea K. Davis, Peristera Paschou, Giovanni Coppola, Carol A. Mathews, Jeremiah M. Scharfon behalf of the Tourette Association of America International Consortium for Genetics (TAAICG), the Gilles de la Tourette GWAS Replication Initiative (GGRI), the Tourette International Collaborative Genetics (TIC Genetics), and the Psychiatric Genomics Consortium Tourette Syndrome Working Group (PGC-TS)*
